# Supplementary material for: Modelling indoor radical chemistry during the HOMEChem campaign
Source: Royal Society of Chemistry journal article supplement (doi:10.1039/d4em00628c), 2024-12-11
Supplement: d4em00628c1.pdf [file d4em00628c1.pdf]

## Modelling Indoor Radical Chemistry during the HOMEChem Campaign Supplementary Information

Freja F. Østerstrøm,<sup>‡a,b,c</sup> Toby J. Carter,<sup>‡a</sup> David R. Shaw,<sup>a</sup> Jonathan P. D. Abbatt,<sup>d</sup> Andrew Abeleira,<sup>e</sup> Caleb Arata,<sup>f,g</sup> Brandon P. Bottorff,<sup>h</sup> Felipe J. Cardoso-Saldaña,<sup>i</sup> Peter F. DeCarlo,<sup>j</sup> Delphine K. Farmer,<sup>e</sup> Allen H. Goldstein,<sup>g,k</sup> Lea Hildebrandt Ruiz,<sup>i</sup> Tara F. Kahan,<sup>l,m</sup> James M. Mattila,<sup>e</sup> Atila Novoselac,<sup>n</sup> Philip S. Stevens,<sup>h,o</sup> Emily Reidy,<sup>h</sup> Colleen Marciel F. Rosales,<sup>o</sup> Chen Wang,<sup>d</sup> Shan Zhou<sup>l,p</sup> and Nicola Carslaw<sup>a\*</sup>

\* Corresponding email: nicola.carslaw@york.ac.uk

‡ These authors contributed equally to this work

<sup>a</sup> *Department of Environment and Geography, University of York, York, United Kingdom*

<sup>b</sup> *Harvard John A. Paulson School of Engineering and Applied Sciences, Harvard University, Cambridge, MA, USA*

<sup>c</sup> *Department of Chemistry, University of Copenhagen, Copenhagen, Denmark*

<sup>d</sup> *Department of Chemistry, University of Toronto, Toronto, Canada*

<sup>e</sup> *Department of Chemistry, Colorado State University, Fort Collins, CO, USA*

<sup>f</sup> *Department of Chemistry, University of California Berkeley, Berkeley, CA, USA*

<sup>g</sup> *Department of Environmental Science, Policy and Management, University of California Berkeley, Berkeley, CA, USA*

<sup>h</sup> *Department of Chemistry, Indiana University Bloomington, Bloomington, IN, USA*

<sup>i</sup> *McKetta Department of Chemical Engineering, University of Texas at Austin, Austin, TX, USA*

<sup>j</sup> *Department of Environmental Health and Engineering, Johns Hopkins University, Baltimore, MD, USA*

<sup>k</sup> *Department of Civil and Environmental Engineering, University of California Berkeley, Berkeley, CA, USA*

<sup>l</sup> *Department of Chemistry, Syracuse University, Syracuse, NY, USA*

<sup>m</sup> *Department of Chemistry, University of Saskatchewan, Saskatoon, Canada*

<sup>n</sup> *Department of Civil, Architectural, and Environmental Engineering, University of Texas at Austin, Austin, TX, USA*

<sup>o</sup> *O'Neill School of Public and Environmental Affairs, Indiana University Bloomington, Bloomington, IN, USA*

<sup>p</sup> *Department of Civil and Environmental Engineering, Rice University, Houston, TX, USA*

Table S1: Species and rates input into the model as per measured values.

|                                                 |                                                                                                                                                                                                                                                                                                                                                                                                                                                                                                                                                                                                                                                                                                                                                                                                                                                                                                                                                                                                                                                                                                                                                                                                                                                                                                                                                                                                                                                                                                                                                                                                                                                                                                                                                                                                                                                                                                                                                                                                                                                                                                                                                                                              |
|-------------------------------------------------|----------------------------------------------------------------------------------------------------------------------------------------------------------------------------------------------------------------------------------------------------------------------------------------------------------------------------------------------------------------------------------------------------------------------------------------------------------------------------------------------------------------------------------------------------------------------------------------------------------------------------------------------------------------------------------------------------------------------------------------------------------------------------------------------------------------------------------------------------------------------------------------------------------------------------------------------------------------------------------------------------------------------------------------------------------------------------------------------------------------------------------------------------------------------------------------------------------------------------------------------------------------------------------------------------------------------------------------------------------------------------------------------------------------------------------------------------------------------------------------------------------------------------------------------------------------------------------------------------------------------------------------------------------------------------------------------------------------------------------------------------------------------------------------------------------------------------------------------------------------------------------------------------------------------------------------------------------------------------------------------------------------------------------------------------------------------------------------------------------------------------------------------------------------------------------------------|
| Inorganic compounds and physical parameters (9) | Nitric oxide (NO), Nitrogen dioxide (NO <sub>2</sub> ), Ozone (O <sub>3</sub> ), Outdoor NO (NO <sub>out</sub> ), Outdoor NO <sub>2</sub> (NO <sub>2,out</sub> ), Outdoor O <sub>3</sub> (O <sub>3,out</sub> ), Water (H <sub>2</sub> O), Temperature, Humans                                                                                                                                                                                                                                                                                                                                                                                                                                                                                                                                                                                                                                                                                                                                                                                                                                                                                                                                                                                                                                                                                                                                                                                                                                                                                                                                                                                                                                                                                                                                                                                                                                                                                                                                                                                                                                                                                                                                |
| VOCs (45)                                       | Carbon monoxide (CO), Methane (CH <sub>4</sub> ), Ethane (C <sub>2</sub> H <sub>6</sub> ), Propane (C <sub>3</sub> H <sub>8</sub> ), n-butane (n-C <sub>4</sub> H <sub>10</sub> ), i-Butane (C <sub>4</sub> H <sub>10</sub> ), n-Pentane (C <sub>5</sub> H <sub>12</sub> ), n-Hexane (C <sub>6</sub> H <sub>14</sub> ), n-Heptane (n-C <sub>7</sub> H <sub>16</sub> ), n-Octane (C <sub>8</sub> H <sub>18</sub> ), n-Nonane (C <sub>9</sub> H <sub>20</sub> ), n-Decane (C <sub>10</sub> H <sub>22</sub> ), Ethene (C <sub>2</sub> H <sub>4</sub> ), Propene (C <sub>3</sub> H <sub>6</sub> ), 1-Butene (C <sub>4</sub> H <sub>8</sub> ), cis-2-Butene (C <sub>4</sub> H <sub>8</sub> ), trans-2-Butene (C <sub>4</sub> H <sub>8</sub> ), 2-Methyl-1-propene (C <sub>4</sub> H <sub>8</sub> ), 2-Methyl-1-butene (C <sub>5</sub> H <sub>10</sub> ), cis-2-Pentene (C <sub>5</sub> H <sub>10</sub> ), i-Pentene (C <sub>5</sub> H <sub>12</sub> ), Ethyne (C <sub>2</sub> H <sub>2</sub> ), Isoprene (C <sub>5</sub> H <sub>8</sub> ), Benzene (C <sub>6</sub> H <sub>6</sub> ), Toluene (C <sub>7</sub> H <sub>8</sub> ), Styrene (C <sub>8</sub> H <sub>8</sub> ), m-Xylene (C <sub>8</sub> H <sub>10</sub> ), o-Xylene (C <sub>8</sub> H <sub>10</sub> ), p-Xylene (C <sub>8</sub> H <sub>10</sub> ), Ethylbenzene (C <sub>8</sub> H <sub>10</sub> ), 1,2,3-Trimethylbenzene (C <sub>9</sub> H <sub>12</sub> ), 1,3,5-Trimethylbenzene (C <sub>9</sub> H <sub>12</sub> ), o-Ethyltoluene (C <sub>9</sub> H <sub>12</sub> ), m-Ethyltoluene (C <sub>9</sub> H <sub>12</sub> ), p-Ethyltoluene (C <sub>9</sub> H <sub>12</sub> ), Limonene (C <sub>10</sub> H <sub>16</sub> ), $\alpha$ -pinene (C <sub>10</sub> H <sub>16</sub> ), $\beta$ -pinene (C <sub>10</sub> H <sub>16</sub> ), Acetaldehyde (CH <sub>3</sub> CHO), Acetone (CH <sub>3</sub> COCH <sub>3</sub> ), Methyl ethyl ketone (MEK, C <sub>4</sub> H <sub>8</sub> O), Methyl nitrate (CH <sub>3</sub> NO <sub>3</sub> ), Ethyl nitrate (C <sub>2</sub> H <sub>5</sub> NO <sub>3</sub> ), n-Propyl nitrate (C <sub>3</sub> H <sub>7</sub> NO <sub>3</sub> ), 2-Butyl nitrate (C <sub>4</sub> H <sub>9</sub> NO <sub>3</sub> ) |
| Cl-containing compounds (6)                     | Molecular chlorine (Cl <sub>2</sub> ), Hypochlorous acid (HOCl), Trichloromethane (CHCl <sub>3</sub> ), 1,1,2,2-tetrachloroethane (C <sub>2</sub> H <sub>2</sub> Cl <sub>4</sub> ), Chloroformic acid (ClCO <sub>2</sub> H), Chlorine nitrite (ClNO <sub>2</sub> ),                                                                                                                                                                                                                                                                                                                                                                                                                                                                                                                                                                                                                                                                                                                                                                                                                                                                                                                                                                                                                                                                                                                                                                                                                                                                                                                                                                                                                                                                                                                                                                                                                                                                                                                                                                                                                                                                                                                          |
| Photolysis rates (11)                           | J <sub>NO<sub>2</sub></sub> (J4), J <sub>O<sub>3</sub></sub> (J1), J <sub>NO<sub>3</sub>→NO<sub>2</sub></sub> (J5), J <sub>NO<sub>3</sub>→NO</sub> (J6), J <sub>HONO</sub> (J7), J <sub>H<sub>2</sub>O<sub>2</sub></sub> (J3), J <sub>Cl<sub>2</sub></sub> (J70), J <sub>HOCl</sub> (J74), J <sub>ClNO<sub>2</sub></sub> (J71), J <sub>ClOOC<sub>2</sub>Cl</sub> (J77), J <sub>OClO</sub> (J75)                                                                                                                                                                                                                                                                                                                                                                                                                                                                                                                                                                                                                                                                                                                                                                                                                                                                                                                                                                                                                                                                                                                                                                                                                                                                                                                                                                                                                                                                                                                                                                                                                                                                                                                                                                                              |
